# Supplementary material for: VEGF-B Is an Autocrine Gliotrophic Factor for Müller Cells under Pathologic Conditions
Source: PubMed Central journal article supplement — Invest Ophthalmol Vis Sci. 2020 Sep 18;61(11):35. doi: 10.1167/iovs.61.11.35 (PMC7509798; doi:10.1167/iovs.61.11.35), 2020-09-18
Supplement: iovs-61-11-35_s001.pdf [file iovs-61-11-35_s001.pdf]

**A)**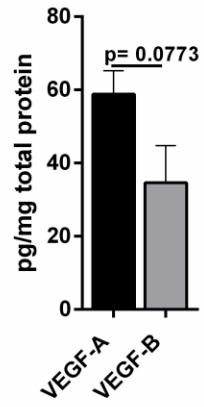**B)**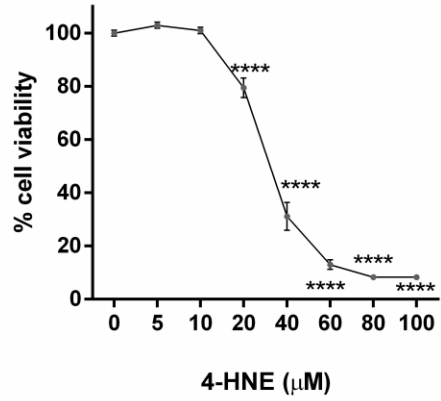**C)**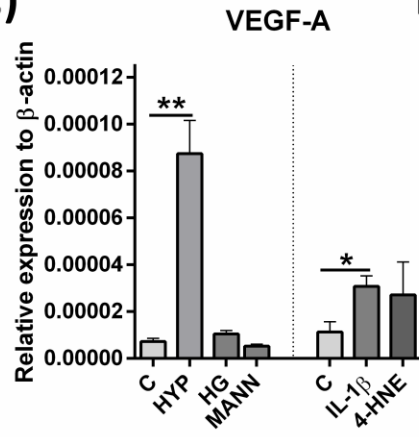**D)**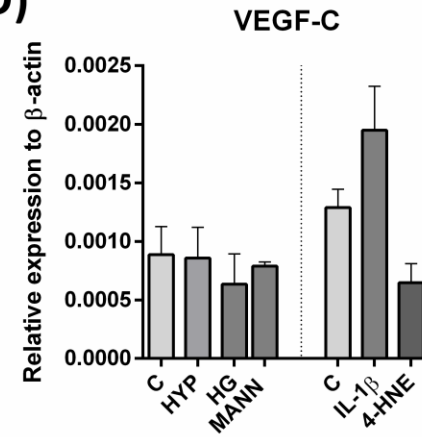**E)**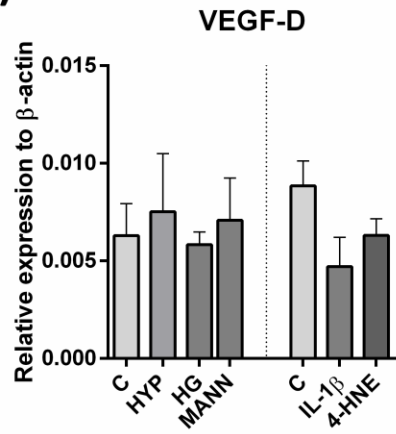**F)**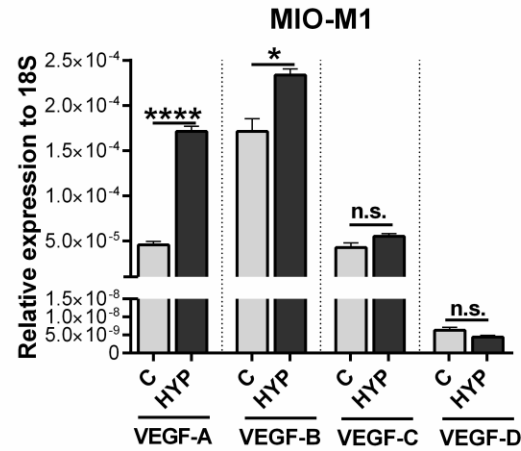**G)**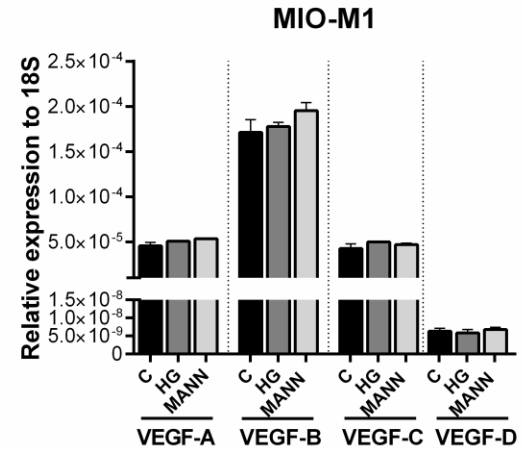

**Supplementary Figure S1. A**, VEGF-A and VEGF-B protein measurement in supernatant of QMMuC1 Muller cells (Student t-test). **B**, Dose-effect on Müller cells viability of 4-HNE. 10  $\mu$ M 4-HNE dose did not induce any significant decrease in viability and was hence chosen for induce oxidative stress. 20  $\mu$ M dose was chose for survival studies. \*\*\*\*  $p < 0,001$ , compared with control group. One-Way ANOVA followed by a Dunnett's multiple comparison test. **C-E**, mRNA expression of VEGF-A (**C**), VEGF-C (**D**) and VEGF-E (**E**) in QMMuC-1 Müller cells under different stress conditions determined by qPCR. **F & G**, mRNA expression of VEGF-A, B, C and D in human MIO-M1 under hypoxia (**F**) and high glucose/mannitol (**G**) and its receptors VEGFR1 and NRP1 under different stress conditions. HYP, hypoxia (1%O<sub>2</sub>), HG/MANN, high glucose or mannitol (30mM). n=3-5 per group. \* $p < 0.05$ ; \*\* $p < 0.01$ ; \*\*\*\* $p < 0.005$  Student t-test, compared with respective control.
