# Supplementary material for: VEGF-B Is an Autocrine Gliotrophic Factor for Müller Cells under Pathologic Conditions
Source: PubMed Central journal article supplement — Invest Ophthalmol Vis Sci. 2020 Sep 18;61(11):35. doi: 10.1167/iovs.61.11.35 (PMC7509798; doi:10.1167/iovs.61.11.35), 2020-09-18
Supplement: iovs-61-11-35_s002.pdf [file iovs-61-11-35_s002.pdf]

**A)**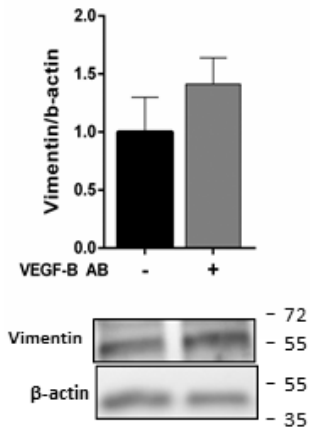**B)**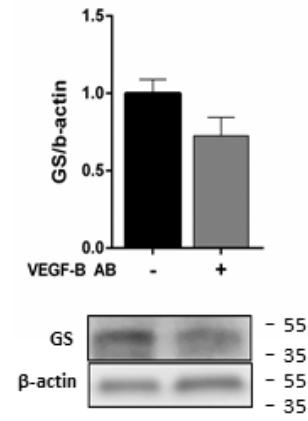**C)**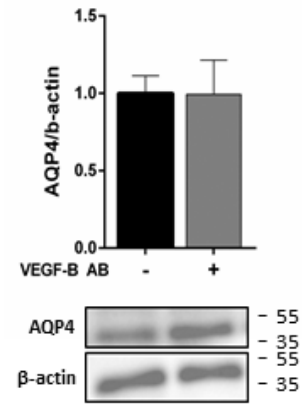**D)**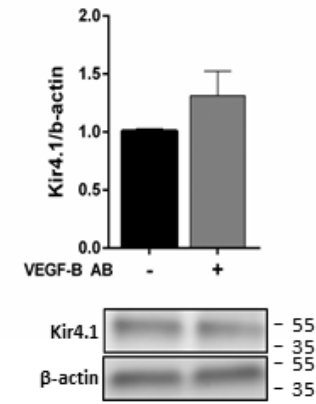**E)**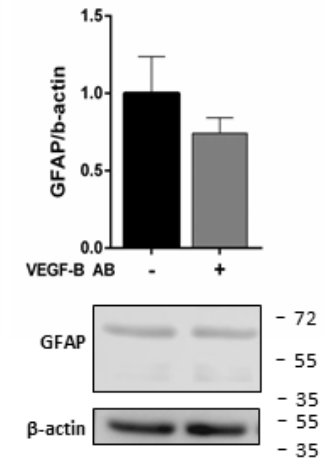**F)**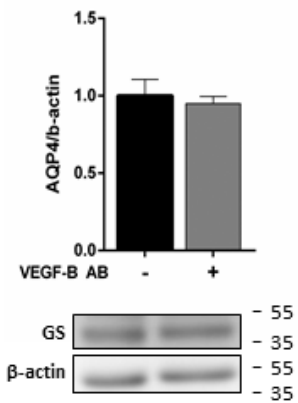**G)**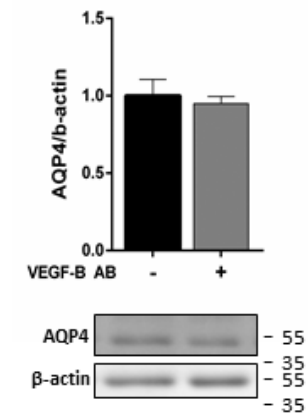**H)**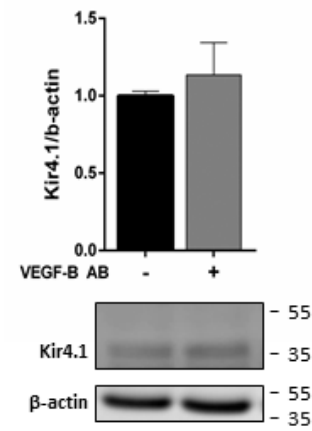**i)**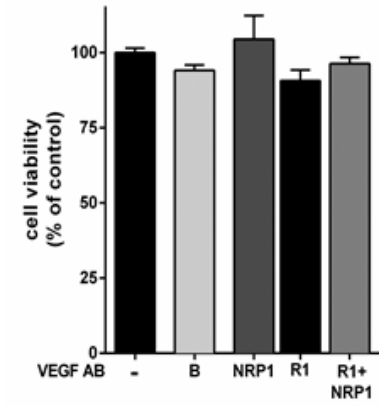

**Supplementary Figure S2. Effect of VEGF-B neutralization on QMMuC-1 Müller cell homeostasis.** QMMuC-1 cells were treated with anti-VEGF-B neutralizing antibody (500 ng/mL) for 24 h (**A-D**) or 72 h (**E-H**) and the expression of the main proteins involved in Müller functionality was examined by Western Blot. Effect of VEGF-B neutralization for 24 h on the protein expression of vimentin (**A**), GS (**B**), AQP4 (**C**) and Kir4.1 (**D**) and 72 h on GFAP (**F**), GS (**F**), AQP4 (**G**) and Kir4.1 (**H**) expression. Data normalized to control values, n=4 per group. **I**, QMMuC-1 Müller cells viability after 72 h neutralization of VEGF-B or its receptors alone (anti-VEGFR1 antibody, 10 µg/mL) or in combination (anti-NRP1 30 µg/mL + anti-VEGFR1 10 µg/mL) measured with Alamar Blue. n=6-9 per group. VEGF AB, VEGF-related antibodies; B, VEGF-B; R1, VEGFR1.
