# Supplementary material for: VEGF-B Is an Autocrine Gliotrophic Factor for Müller Cells under Pathologic Conditions
Source: PubMed Central journal article supplement — Invest Ophthalmol Vis Sci. 2020 Sep 18;61(11):35. doi: 10.1167/iovs.61.11.35 (PMC7509798; doi:10.1167/iovs.61.11.35), 2020-09-18
Supplement: iovs-61-11-35_s003.pdf [file iovs-61-11-35_s003.pdf]

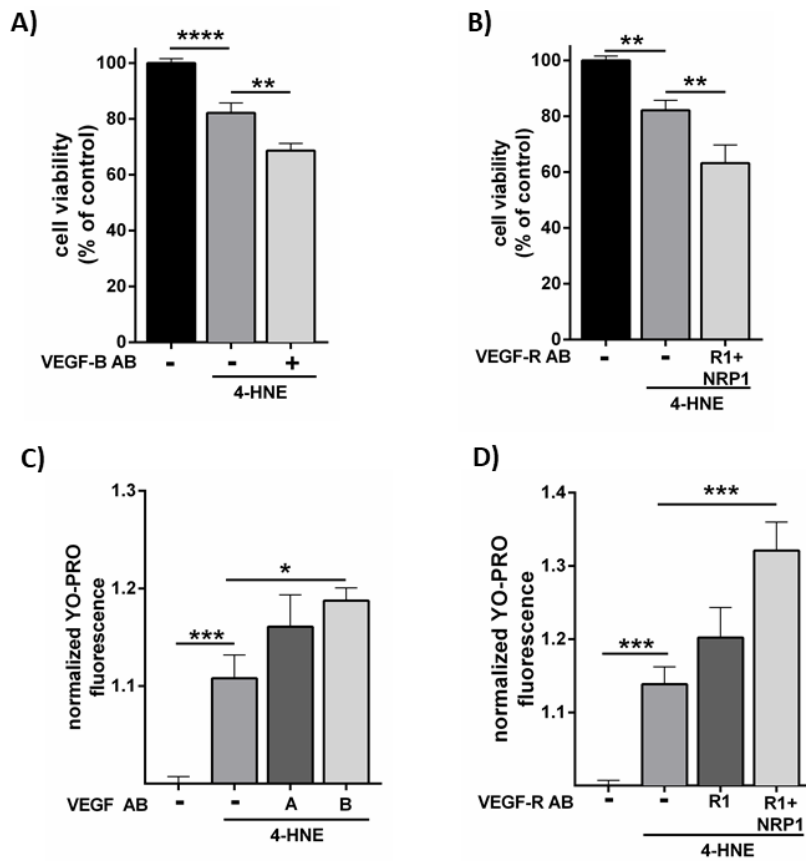

**Supplementary Figure S3. Effect of VEGF-B neutralization on viability and apoptosis of 4-HNE treated PMC and QMMuC-1 Müller cells.** (A) Müller PMC cells exposed to 20  $\mu$ M 4-HNE with/without anti-VEGF-B neutralizing antibody (VEGF-B AB) or antibodies against both receptors (anti-NRP1 and anti-VEGFR1) (B) for 24 h. The cell viability was examined by Alamar Blue. C and D) QMMuC-1 cells were treated 20  $\mu$ M 4-HNE with/without anti-VEGF-A and VEGF-B neutralizing antibodies (C) or antibodies against VEGFR1 and NRP1 (D) for 24 h. The Yo-Pro uptake assay was used to determine apoptosis. Anti-VEGF-A 500 ng/mL; NRP1 antibody, 30  $\mu$ g/mL; VEGF-B and VEGFR1, 500 ng/mL and 10  $\mu$ g/mL, respectively. 4-HNE 20  $\mu$ M. n= 6-10. \* $p$ <0,05; \*\* $p$ <0,01; \*\*\* $p$ <0,005 \*\*\*\* $p$ <0,001, One-Way ANOVA followed by a Newmann-Keuls post hoc test.
