# Supplementary material for: VEGF-B Is an Autocrine Gliotrophic Factor for Müller Cells under Pathologic Conditions
Source: PubMed Central journal article supplement — Invest Ophthalmol Vis Sci. 2020 Sep 18;61(11):35. doi: 10.1167/iovs.61.11.35 (PMC7509798; doi:10.1167/iovs.61.11.35), 2020-09-18
Supplement: iovs-61-11-35_s004.pdf [file iovs-61-11-35_s004.pdf]

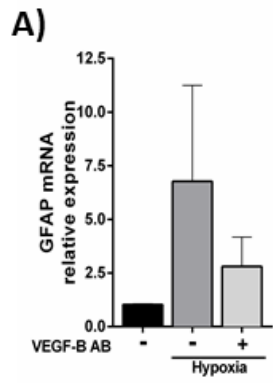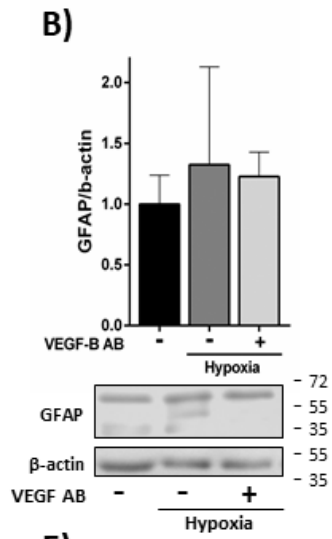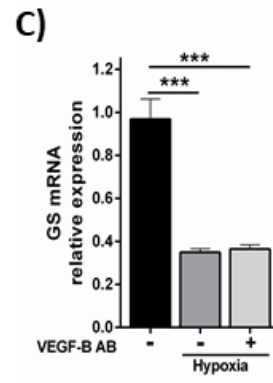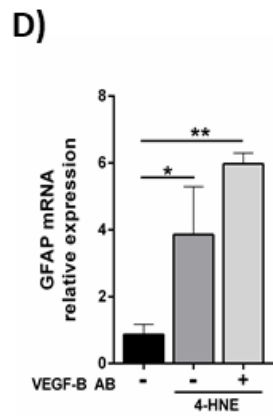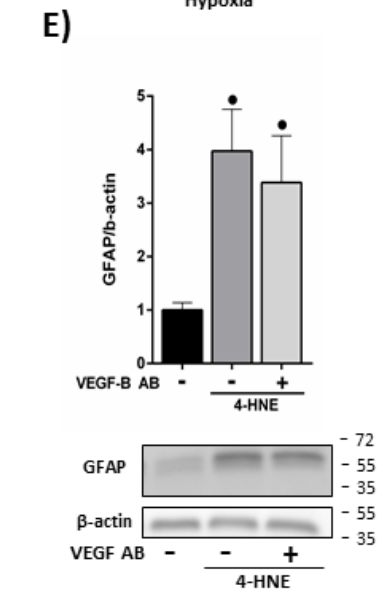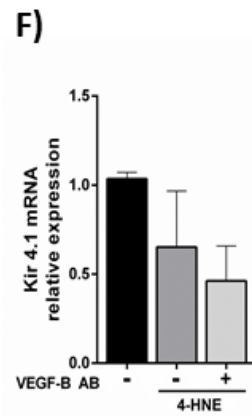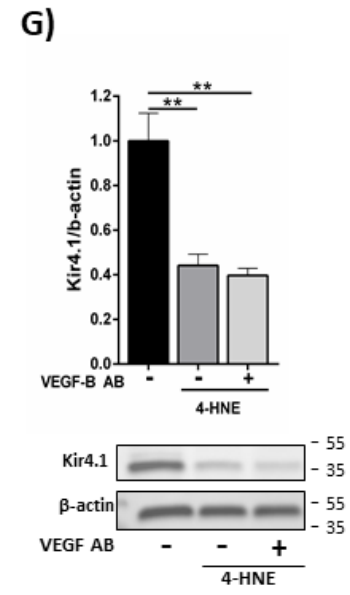

**Supplementary Figure S4. The effect of VEGF-B neutralization on the expression of GFAP, GS and Kir4.1 in QMMuC-1 cells under stress conditions.** QMMuC-1 Müller cells cultured under hypoxia condition were treated with anti-VEGF-B neutralizing antibody for 72 h and the gene and protein expression of GFAP (**A** and **B**, respectively) and GS (**C**) was determine by qPCR and Western blot. **D-E**) QMMuC-1 cells treated with 4-HNE (10  $\mu$ M) with/without VEGF-B neutralization and the expression of GFAP (**D**, mRNA and **E**, protein) and Kir4.1 mRNA (**F**) and protein (**G**) by qPCR and Western Blot. \*  $p < 0,05$ ; \*\*  $p < 0,01$ ; \*\*\*  $p < 0,005$  , One-Way ANOVA followed by Newmann-Keuls comparing all groups. AB, Antibody. Anti-VEGF-B antibody, 500 ng/mL. Data represented normalized to control values. n=4-5/group in qPCR and Western Blot.
